# Supplementary material for: Pore morphology: a vital factor in determining electrochemical properties of electrical double layer capacitors
Source: Royal Society of Chemistry journal article supplement (doi:10.1039/c3cc45055d), 2013-01-01
Supplement: c3cc45055d.pdf [file c3cc45055d.pdf]

## Supporting Information

### Pore morphology: a vital factor in determining electrochemical properties for electrical double layer capacitors

Yeru Liang, Zhenghui Li, Xiaoqing Yang, Ruowen Fu, Dingcai Wu\*

*Materials Science Institute, Key Laboratory for Polymeric Composite and Functional*

*Materials of Ministry of Education, School of Chemistry and Chemical Engineering,*

*Sun Yat-sen University, Guangzhou 510275, P. R. China*

#### Experimental

##### 1. Sample preparation

**Synthesis of SBA-15.** SBA-15 was prepared according to the method described in the reference<sup>1</sup>. Briefly, 10 g of P123, 182 ml of H<sub>2</sub>O, and 4.6 ml of HCl (37 wt.%) were mixed and stirred until complete homogenization. Subsequently, 17.3 ml of TEOS was added and continuously stirred at 35 °C for 24 h. After that, the mixture was heated at 100 °C for 24 h. The product was filtered, dried and then calcined in the air at 550 °C for 6 h, leading to formation of SBA-15.

**Synthesis of OMC.** OMC was prepared according to the procedures reported in the reference<sup>1</sup>. Briefly, 10 g of SBA-15 was added to a solution obtained by dissolving 12.5 g of sucrose and 1.4 g of H<sub>2</sub>SO<sub>4</sub> in 50 g of H<sub>2</sub>O. The mixture was reacted for 6 h at 100 °C and subsequently for 6 h at 160 °C. The obtained sample was treated again at 100 and 160 °C after the addition of 8 g of sucrose, 0.8 g of H<sub>2</sub>SO<sub>4</sub> and 50 g of

H<sub>2</sub>O. Then the sample was heated to 900 °C with a heating rate of 5 °C/min, and kept at this carbonization temperature for 3 h in N<sub>2</sub> flow. After that, the carbon/silica composites were washed using HF solution to obtain OMC.

**Synthesis of WMC.** WMC was prepared according to the procedures reported in our previous work<sup>2</sup>. Briefly, 2 g of sucrose was dissolved in 3 ml of H<sub>2</sub>SO<sub>4</sub> (pH=2.0), followed by adding 4 ml of tetraethyl orthosilicate (TEOS). The mixture was stirred continuously until complete homogenization. Subsequently, 4 wt.% hydrofluoric acid (HF) solution (HF/TEOS molar ratio = 1/30) was added under stirring. The obtained homogeneous mixture was quickly gelled and aged in an open plastic bottle at 40 °C for 2 days. The obtained sample was further reacted for 6 h at 100 °C and subsequently for 6 h at 160 °C. Then the resulting sucrose/silica gel composite was heated to 900 °C with a heating rate of 5 °C /min, and kept at this carbonization temperature for 3 h in N<sub>2</sub> flow. After that, the carbon/silica composite was washed using HF solution to obtain WMC.

**Synthesis of silica gel.** The silica gel template was prepared by calcination of the sucrose/silica gel composite, which was obtained in the section of “Synthesis of WMC”, in the air at 550 °C for 6 h.

## 2. Characterization

Low-angle XRD patterns were recorded on a D-MAX 2200 VPC diffractometer using Cu K $\alpha$  radiation (40 kV, 30 mA). N<sub>2</sub> adsorption measurements were carried out using a Micromeritics ASAP 2010 analyzer at 77 K. The pore size distributions of the samples were derived from the adsorption branch by Barrett-Joyner-Halendar (BJH)

theory with Kruk-Jaroniec-Sayari correction<sup>3</sup>. The BET surface area ( $S_{\text{BET}}$ ) and the mesopore volume ( $V_{\text{mes}}$ ) were determined by BET theory and BJH method, respectively.

The electrode was obtained by pressing a mixture film of carbon sample (92 wt%) and polytetrafluorethylene (8 wt%) into a nickel foam current collector. 6 mol/L KOH aqueous solution was chosen as the electrolyte. The cyclic voltammetry (CV) and electrochemical impedance spectroscopy (EIS) measurements were carried out in a coin-type cell using an IM6e electrochemical workstation. The galvanostatic charge-discharge behavior was characterized by BT2000 (ARBIN Instruments).

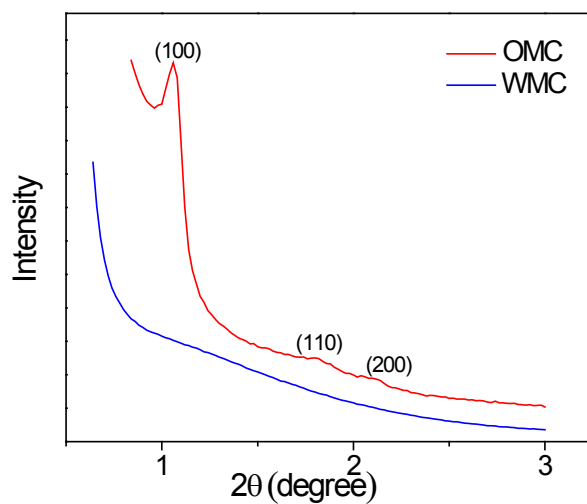

Fig. S1 XRD patterns of OMC and WMC samples.

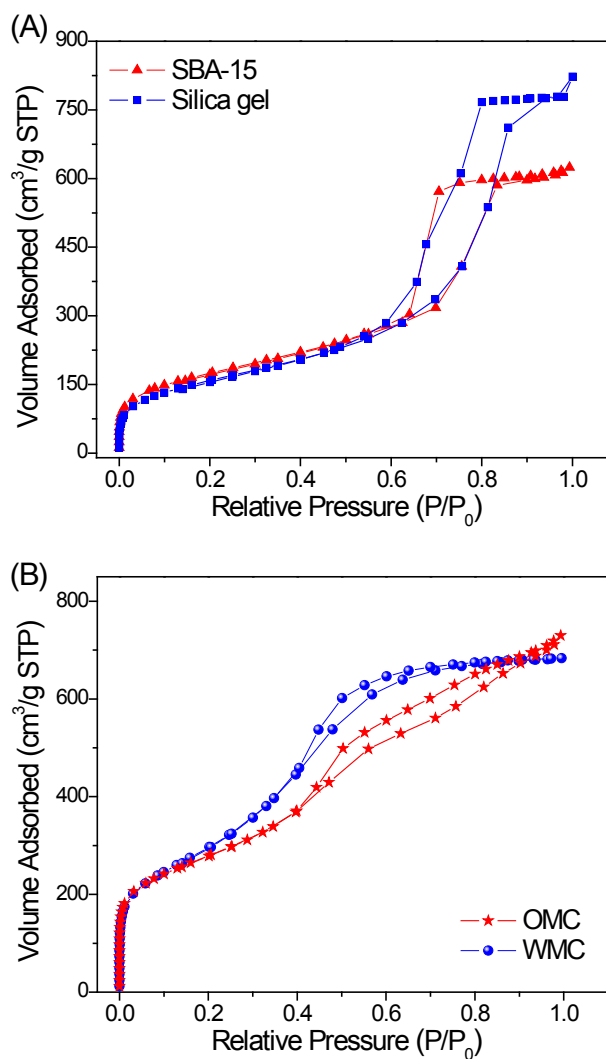

Fig. S2 N<sub>2</sub> adsorption-desorption isotherms of (A) silica templates and (B) porous carbon samples.

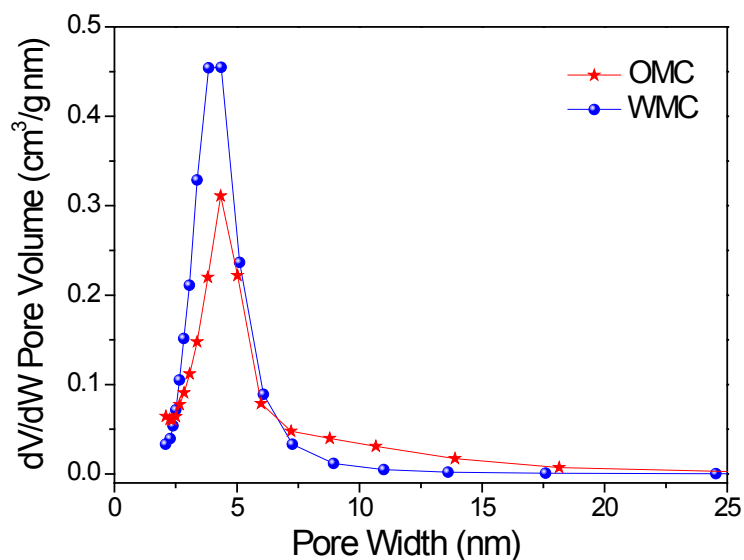

Fig. S3 BJH adsorption dV/dW pore size distributions of OMC and WMC samples.

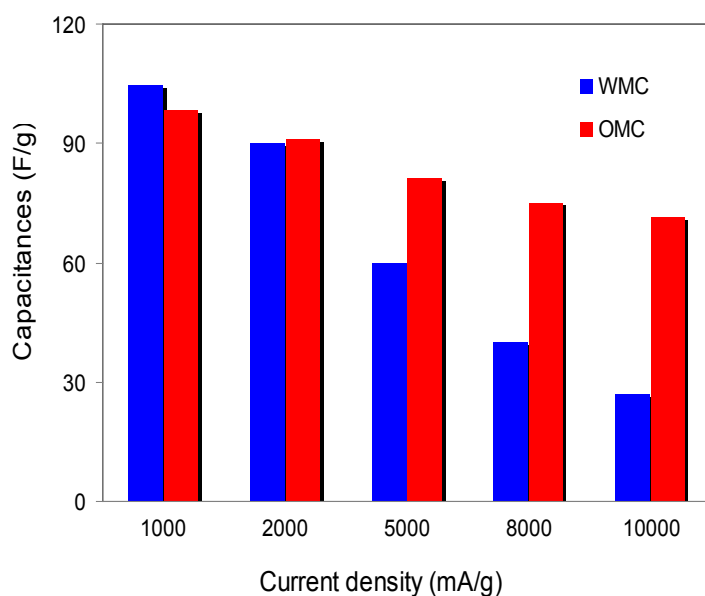

Fig. S4 Mass capacitances of WMC and OMC samples.

## References

1. S. Jun, S. H. Joo, R. Ryoo, M. Kruk, M. Jaroniec, Z. Liu, T. Ohsuna and O. Terasaki, *J. Am. Chem. Soc.*, 2000, **122**, 10712.
2. D. C. Wu, Z. H. Li, Y. R. Liang, X. Q. Yang, X. H. Zeng and R. W. Fu, *Carbon*, 2009, **47**, 916.
3. M. Kruk, M. Jaroniec and A. Sayari, *Langmuir*, 1997, **13**, 6267.
